# Supplementary material for: VarQ: A Tool for the Structural and Functional Analysis of Human Protein Variants
Source: Front Genet. 2018 Dec 6;9:620. doi: 10.3389/fgene.2018.00620 (PMC6291447; doi:10.3389/fgene.2018.00620)
Supplement: FIGURE S1 — Novel mutations found by VarQ not analyzed by Kiel and Serrano (2014). [file Table_1.XLSX]

## Sheet: newMutations
uniprot	pdb	chain	gene	respos	resorig	resvar	lowestEnergy	averageEnergy	isBinding	betaFactor	conservation(bits)	interfaces	percentageExposed	switchability	aggregability
P01111	5UHV	A	NRAS	34	P	L	0.890576	0.890576	0	0.496512	0	False	0.357839	0.0545	0	NRAS34L
P01111	5UHV	A	NRAS	24	I	N	1.953	1.953	0	0.57265	0	False	0.0826257	0.00942	7.287	NRAS24N
Q02750	3W8Q	A	MAP2K1	347	A	T	0.230872	0.230872	0	0.399971	0	False	0.369997	0	0	MAP2K1347T
Q02750	3W8Q	A	MAP2K1	222	S	A	0.520426	0.520426	0	0.507264	0	True	0.197443	0.13	0	MAP2K1222A
Q02750	3W8Q	A	MAP2K1	97	K	R	0.78444	0.78444	2	0.234483	0	True	0.150305	0	3.376	MAP2K197R
Q02750	3W8Q	A	MAP2K1	212	S	A	-1.07889	-1.07889	2	0.261748	0	True	0.114459	0	0.201	MAP2K1212A
Q02750	3W8Q	A	MAP2K1	150	S	A	0.685137	0.685137	2	0.200543	0	True	0.0714886	0	0	MAP2K1150A
Q02750	3W8Q	A	MAP2K1	218	S	A	-1.30094	-1.30094	0	0.353503	0	True	0.00681405	0.373	0	MAP2K1218A
P01112	4K81	B	HRAS	119	D	N	0.0393138	0.0393138	0	0	0	False	0	0	0	HRAS119N
P01112	4K81	B	HRAS	118	C	S	0.488885	0.488885	0	0	0	False	0	0	0	HRAS118S
P01112	4K81	B	HRAS	89	S	C	2.19839	2.19839	0	0.590345	0	True	0.00339722	0	74.741	HRAS89C
P01112	4K81	B	HRAS	83	A	T	1.35916	1.35916	0	0.515205	0	True	0.0239974	0	71.45	HRAS83T
P01112	4K81	B	HRAS	29	V	A	0.743679	0.743679	2	0.503895	0	True	0.137042	0	7.253	HRAS29A
P01112	4K81	B	HRAS	26	N	G	-0.377508	-0.377508	0	0.461287	0	True	0.0970888	0	7.807	HRAS26G
P01112	4K81	B	HRAS	61	Q	I	-1.23477	-1.23477	0	0.468773	0	True	0.149658	0	0	HRAS61I
P01112	4K81	B	HRAS	61	Q	V	-0.269884	-0.269884	0	0.468773	0	True	0.149658	0	0	HRAS61V
P01112	4K81	B	HRAS	144	T	I	0.274367	0.274367	0	0	0	False	0	0	0	HRAS144I
P01112	4K81	B	HRAS	39	S	C	-1.01502	-1.01502	2	0.28195	0	True	0.0831163	0	0	HRAS39C
P01112	4K81	B	HRAS	38	D	N	0.619892	0.619892	0	0.273461	0	True	0.0679466	0	0	HRAS38N
P01112	4K81	B	HRAS	32	Y	F	-0.789795	-0.789795	2	0.395522	0	True	0.187679	0	0	HRAS32F
P01112	4K81	B	HRAS	37	E	G	0.745493	0.745493	0	0.285634	0	True	0.0870379	0	0	HRAS37G
P01112	4K81	B	HRAS	35	T	S	0.650108	0.650108	2	0.298321	0	True	0.0534246	0	0	HRAS35S
P01112	4K81	B	HRAS	59	A	T	-0.120346	-0.120346	0	0.338829	0	True	0.0340005	0	0	HRAS59T
P01112	4K81	B	HRAS	17	S	N	3.90569	3.90569	2	0.290998	0	True	0.188763	0	70.341	HRAS17N
P01112	4K81	B	HRAS	13	G	R	2.00617	2.00617	2	0.421222	0	True	0	0	80.375	HRAS13R
P01112	4G3X	A	HRAS	83	A	T	-0.841272	-0.841272	0	0.548471	0	True	0.00399957	0.0115	81.044	HRAS83T
P01112	4G3X	A	HRAS	38	D	N	2.21894	2.21894	0	0.78225	0	True	0.10476	0.342	0	HRAS38N
P01112	4G3X	A	HRAS	89	S	C	0.409764	0.409764	0	0.496697	0	True	0.00336743	0.0216	0	HRAS89C
P01112	4G3X	A	HRAS	39	S	C	-0.596795	-0.596795	0	0.735392	0	True	0.0327449	0.906	0	HRAS39C
P01112	4G3X	A	HRAS	144	T	I	1.14041	1.14041	0	0.450453	0	True	0	0.0443	0	HRAS144I
P01112	4G3X	A	HRAS	34	P	G	2.24186	2.24186	0	0.616761	0	True	0.385938	0.0545	0	HRAS34G
P01112	4G3X	A	HRAS	35	T	S	-2.24707	-2.24707	2	0.682107	0	True	0.136831	0.0956	0	HRAS35S
P01112	4G3X	A	HRAS	37	E	G	0.722133	0.722133	0	0.795565	0	True	0.156104	0.172	0	HRAS37G
P01112	4G3X	A	HRAS	32	Y	F	-0.182506	-0.182506	2	0.575997	0	True	0.462144	0	0	HRAS32F
P01112	4G3X	A	HRAS	59	A	T	0.236323	0.236323	0	0.673068	0	True	0.0119987	0	0	HRAS59T
P01112	4G3X	A	HRAS	118	C	S	-0.0467921	-0.0467921	0	0.538408	0	True	0.14076	0	0	HRAS118S
P01112	4G3X	A	HRAS	119	D	N	0.906398	0.906398	2	0.52558	0	True	0.106299	0	0	HRAS119N
P01112	4G3X	A	HRAS	26	N	G	-0.427216	-0.427216	0	0.628156	0	True	0.413707	0	0	HRAS26G
P01112	4G3X	A	HRAS	29	V	A	0.972716	0.972716	2	0.652686	0	True	0.0939678	0	0	HRAS29A
P01112	1K8R	A	HRAS	83	A	T	0.425508	0.425508	0	0.284822	0	True	0.00600349	0.0115	81.044	HRAS83T
P01112	1K8R	A	HRAS	38	D	N	0.908498	0.908498	0	0.4839	0	True	0.0142215	0.342	0	HRAS38N
P01112	1K8R	A	HRAS	89	S	C	1.84598	1.84598	0	0.230567	0	True	0.00170667	0.0216	0	HRAS89C
P01112	1K8R	A	HRAS	39	S	C	-1.14395	-1.14395	0	0.498654	0	True	0.0174098	0.906	0	HRAS39C
P01112	1K8R	A	HRAS	144	T	I	1.97388	1.97388	0	0.386959	0	True	0.00563637	0.0443	0	HRAS144I
P01112	1K8R	A	HRAS	34	P	G	1.54306	1.54306	2	0.414581	0	True	0.244787	0.0545	0	HRAS34G
P01112	1K8R	A	HRAS	35	T	S	-0.518772	-0.518772	2	0.407343	0	True	0.0422567	0.0956	0	HRAS35S
P01112	1K8R	A	HRAS	37	E	G	-0.5754	-0.5754	0	0.485168	0	True	0.173888	0.172	0	HRAS37G
P01112	1K8R	A	HRAS	32	Y	F	-0.268367	-0.268367	2	0.547249	0	True	0.409067	0	0	HRAS32F
P01112	1K8R	A	HRAS	17	S	N	1.19965	1.19965	2	0.409385	0	True	0.192782	0.0123	0.177	HRAS17N
P01112	1K8R	A	HRAS	13	G	R	0.64146	0.64146	2	0.276872	0	True	0	0	0.461	HRAS13R
P01112	1K8R	A	HRAS	59	A	T	0.483236	0.483236	0	0.502304	0	True	0.0180022	0	0	HRAS59T
P01112	1K8R	A	HRAS	118	C	S	-0.786649	-0.786649	0	0.454236	0	True	0.0320385	0	0	HRAS118S
P01112	1K8R	A	HRAS	119	D	N	0.275353	0.275353	2	0.45504	0	True	0.105763	0	0	HRAS119N
P01112	1K8R	A	HRAS	26	N	G	0.767584	0.767584	0	0.630827	0	True	0.395069	0	0	HRAS26G
P01112	1K8R	A	HRAS	29	V	A	-0.370492	-0.370492	2	0.59343	0	True	0.140278	0	0	HRAS29A
P01112	1K8R	A	HRAS	61	Q	I	-0.629969	-0.629969	0	0.720282	0	True	0.2085	0	0	HRAS61I
P01112	1K8R	A	HRAS	61	Q	V	0.306631	0.306631	0	0.720282	0	True	0.2085	0	0	HRAS61V
P01112	3DDC	A	HRAS	83	A	T	0.176273	0.176273	0	0.362901	0	True	0.0260013	0.0115	81.109	HRAS83T
P01112	3DDC	A	HRAS	38	D	N	0.801243	0.801243	0	0.356195	0	True	0.0170345	0.405	0	HRAS38N
P01112	3DDC	A	HRAS	39	S	C	-0.925264	-0.925264	0	0.365232	0	True	0.239359	1.06	0	HRAS39C
P01112	3DDC	A	HRAS	144	T	I	2.41597	2.41597	0	0.420595	0	True	0.0028242	0.0443	0	HRAS144I
P01112	3DDC	A	HRAS	34	P	G	1.49777	1.49777	2	0.35063	0	True	0.328147	0.0442	0	HRAS34G
P01112	3DDC	A	HRAS	35	T	S	0.780809	0.780809	2	0.333888	0	True	0.0380965	0.0813	0	HRAS35S
P01112	3DDC	A	HRAS	37	E	G	-0.197666	-0.197666	0	0.344828	0	True	0.168293	0.159	0	HRAS37G
P01112	3DDC	A	HRAS	32	Y	F	-0.159234	-0.159234	2	0.40975	0	True	0.447974	0	0	HRAS32F
P01112	3DDC	A	HRAS	17	S	N	5.29263	5.29263	2	0.337788	0	True	0.196824	0.00806	0.178	HRAS17N
P01112	3DDC	A	HRAS	13	G	R	2.36233	2.36233	2	0.350297	0	True	0	0	0.463	HRAS13R
P01112	3DDC	A	HRAS	59	A	T	3.04532	3.04532	0	0.327372	0	True	0.00399957	0	0	HRAS59T
P01112	3DDC	A	HRAS	118	C	S	0.478091	0.478091	0	0.459929	0	True	0.029483	0	0	HRAS118S
P01112	3DDC	A	HRAS	119	D	N	0.124476	0.124476	2	0.50069	0	True	0.0986083	0	0	HRAS119N
P01112	3DDC	A	HRAS	26	N	G	-1.07864	-1.07864	0	0.433008	0	True	0.276964	0	0	HRAS26G
P01112	3DDC	A	HRAS	29	V	A	1.46134	1.46134	0	0.44409	0	True	0.12996	0	0	HRAS29A
P01112	3DDC	A	HRAS	61	Q	I	-0.905525	-0.905525	0	0.37931	0	True	0.394416	0	0	HRAS61I
P01112	3DDC	A	HRAS	61	Q	V	-0.588095	-0.588095	0	0.37931	0	True	0.394416	0	0	HRAS61V
P01112	6AMB	A	HRAS	83	A	T	0.312392	0.312392	0	0.575878	0	False	0.0119987	0.0115	87.259	HRAS83T
P01112	6AMB	A	HRAS	38	D	N	0.753709	0.753709	0	0.629356	0	True	0.050408	0.342	0	HRAS38N
P01112	6AMB	A	HRAS	89	S	C	1.41332	1.41332	0	0.598599	0	False	0	0.0216	0.381	HRAS89C
P01112	6AMB	A	HRAS	39	S	C	-0.598947	-0.598947	0	0.646067	0	True	0.171941	0.906	0	HRAS39C
P01112	6AMB	A	HRAS	144	T	I	1.47661	1.47661	0	0.573318	0	False	0.00144485	0.0266	0	HRAS144I
P01112	6AMB	A	HRAS	34	P	G	2.12119	2.12119	0	0.672984	0	False	0.245492	0.0545	0	HRAS34G
P01112	6AMB	A	HRAS	35	T	S	-0.248187	-0.248187	0	0.629889	0	True	0.0452604	0.0956	0	HRAS35S
P01112	6AMB	A	HRAS	37	E	G	1.08411	1.08411	0	0.653179	0	False	0.142059	0.172	0	HRAS37G
P01112	6AMB	A	HRAS	32	Y	F	-0.250744	-0.250744	0	0.809095	0	False	0.411015	0	0	HRAS32F
P01112	6AMB	A	HRAS	13	G	R	0.629561	0.629561	0	0.529619	0	False	0	0	14.028	HRAS13R
P01112	6AMB	A	HRAS	59	A	T	2.70733	2.70733	0	0.585159	0	False	0.00399957	0	0	HRAS59T
P01112	6AMB	A	HRAS	118	C	S	0.178779	0.178779	0	0.664593	0	False	0.0600291	0	0	HRAS118S
P01112	6AMB	A	HRAS	119	D	N	0.558424	0.558424	0	0.720026	0	False	0.158419	0	0	HRAS119N
P01112	6AMB	A	HRAS	26	N	G	-0.931659	-0.931659	0	0.754658	0	False	0.468208	0	7.308	HRAS26G
P01112	6AMB	A	HRAS	29	V	A	0.455381	0.455381	0	0.849879	0	False	0.246359	0	0	HRAS29A
P01112	6AMB	A	HRAS	61	Q	I	-0.672513	-0.672513	0	0.868724	0	False	0.199462	0	0	HRAS61I
P01112	6AMB	A	HRAS	61	Q	V	-0.0843789	-0.0843789	0	0.868724	0	False	0.199462	0	0	HRAS61V
P01112	2C5L	A	HRAS	83	A	T	1.34228	1.34228	0	0.272252	0	True	0.00399957	0.0115	81.044	HRAS83T
P01112	2C5L	A	HRAS	38	D	N	-1.35994	-1.35994	0	0.353946	0	True	0.0159005	0.342	0	HRAS38N
P01112	2C5L	A	HRAS	89	S	C	2.90458	2.90458	0	0.353355	0	True	0.00339966	0.0216	0	HRAS89C
P01112	2C5L	A	HRAS	39	S	C	-0.854517	-0.854517	0	0.707165	0	True	0.0195975	0.906	0	HRAS39C
P01112	2C5L	A	HRAS	144	T	I	1.42024	1.42024	0	0.285111	0	True	0.00416794	0.0443	0	HRAS144I
P01112	2C5L	A	HRAS	34	P	G	1.74027	1.74027	2	0.391158	0	True	0.226156	0.0545	0	HRAS34G
P01112	2C5L	A	HRAS	35	T	S	0.0372556	0.0372556	2	0.326685	0	True	0.0492224	0.0956	0	HRAS35S
P01112	2C5L	A	HRAS	37	E	G	0.492239	0.492239	0	0.330319	0	True	0.154095	0.172	0	HRAS37G
P01112	2C5L	A	HRAS	32	Y	F	-0.358252	-0.358252	2	0.465355	0	True	0.427275	0	0	HRAS32F
P01112	2C5L	A	HRAS	17	S	N	5.07438	5.07438	2	0.289927	0	True	0.224183	0.00791	0.166	HRAS17N
P01112	2C5L	A	HRAS	13	G	R	1.55258	1.55258	2	0.32773	0	True	0	0	24.006	HRAS13R
P01112	2C5L	A	HRAS	59	A	T	0.790546	0.790546	0	0.340088	0	True	0.0180022	0	0	HRAS59T
P01112	2C5L	A	HRAS	118	C	S	0.617224	0.617224	0	0.348085	0	True	0.0795491	0	0	HRAS118S
P01112	2C5L	A	HRAS	119	D	N	0.587541	0.587541	2	0.35331	0	True	0.0954514	0	0	HRAS119N
P01112	2C5L	A	HRAS	26	N	G	-0.795371	-0.795371	0	0.321096	0	True	0.321646	0	0	HRAS26G
P01112	2C5L	A	HRAS	29	V	A	1.53755	1.53755	2	0.429597	0	True	0.0861828	0	0	HRAS29A
P01112	2C5L	A	HRAS	61	Q	I	-0.915371	-0.915371	2	0.435913	0	True	0.270668	0	0	HRAS61I
P01112	2C5L	A	HRAS	61	Q	V	0.0362133	0.0362133	2	0.435913	0	True	0.270668	0	0	HRAS61V
P01112	6AXG	B	HRAS	39	S	C	-0.718208	-0.718208	0	0.455578	0	False	0.102165	0	0	HRAS39C
P01112	6AXG	B	HRAS	38	D	N	0.188562	0.188562	0	0.477256	0	False	0.49627	0	0	HRAS38N
P01112	6AXG	B	HRAS	13	G	R	2.43862	2.43862	0	0.441965	0	False	0	0	0.463	HRAS13R
P01112	6AXG	D	HRAS	118	C	S	-0.124087	-0.124087	0	0	0	False	0	0	0	HRAS118S
P01112	6AXG	D	HRAS	32	Y	F	-1.07349	-1.07349	0	0.488047	0	False	0.179114	0	0	HRAS32F
P01112	6AXG	B	HRAS	37	E	G	1.68972	1.68972	0	0.595415	0	True	0.353207	0	0	HRAS37G
P01112	6AXG	B	HRAS	34	P	G	3.13843	3.13843	0	0.519493	0	True	0.0622427	0	0	HRAS34G
P01112	6AXG	B	HRAS	59	A	T	1.55408	1.55408	0	0.526977	0	True	0.0119987	0	0	HRAS59T
P01112	6AXG	B	HRAS	61	Q	I	0.927277	0.927277	0	0	0	True	0	0	0	HRAS61I
P01112	6AXG	B	HRAS	61	Q	V	0.399824	0.399824	0	0	0	True	0	0	0	HRAS61V
P01112	6AXG	B	HRAS	17	S	N	-0.59271	-0.59271	0	0.332964	0	True	0.0456499	0	0.181	HRAS17N
P01112	6AXG	B	HRAS	35	T	S	0.139988	0.139988	0	0.576116	0	True	0.231295	0	0	HRAS35S
P01112	6AXG	B	HRAS	144	T	I	-1.51042	-1.51042	0	0	0	False	0	0	0	HRAS144I
P01112	6AXG	B	HRAS	89	S	C	1.19556	1.19556	0	0	0	False	0	0	0	HRAS89C
P01112	6AXG	B	HRAS	83	A	T	0.421932	0.421932	0	0	0	False	0	0	0	HRAS83T
P01112	6AXG	B	HRAS	26	N	G	-0.17556	-0.17556	0	0.411806	0	False	0.513655	0	0	HRAS26G
P01116	4DSO	A	KRAS	147	K	E	1.53963	1.53963	2	0.252695	0	True	0.444576	0	0	KRAS147E
P01116	4DSO	A	KRAS	164	R	A	1.72164	1.72164	0	0.322998	0	False	0.154805	0	0	KRAS164A
P01116	5TAR	A	KRAS	147	K	E	0.808511	0.808511	0	0.333568	0	False	0.461618	0	0	KRAS147E
P01116	5TAR	A	KRAS	164	R	A	1.63834	1.63834	0	0.367182	0	False	0.0939995	0	0	KRAS164A
P36507	4H3Q	B	MAP2K2	4	R	W	0.502039	0.502039	0	1	0	False	0.499996	0	0	MAP2K24W
Q06124	5XZR	A	PTPN11	265	R	Q	0.661223	0.661223	0	0.260615	0	False	0.195374	1.31	0	PTPN11265Q
Q06124	5XZR	A	PTPN11	262	L	R	1.16706	1.16706	0	0.296989	0	False	0.111109	2.89	0	PTPN11262R
Q06124	5XZR	A	PTPN11	262	L	F	0.227696	0.227696	0	0.296989	0	False	0.111109	2.89	0	PTPN11262F
Q06124	5XZR	A	PTPN11	261	L	H	0.461426	0.461426	0	0.303858	0	False	0.0540233	2.39	0	PTPN11261H
Q06124	5XZR	A	PTPN11	261	L	F	0.400905	0.400905	0	0.303858	0	False	0.0540233	2.39	0	PTPN11261F
Q06124	5XZR	A	PTPN11	459	C	S	0.149525	0.149525	0	0.199247	0	False	0.00451106	0.0151	2.783	PTPN11459S
Q06124	5XZR	A	PTPN11	510	Q	E	0.749997	0.749997	0	0.165781	0	False	0.00809257	0.132	0	PTPN11510E
Q07889	3KSY	A	SOS1	655	P	L	0.510513	0.510513	0	0.546851	0	False	0.328788	0	0	SOS1655L
Q07889	3KSY	A	SOS1	282	C	R	0.377477	0.377477	0	0.333344	0	False	0.0713426	0.00397	0	SOS1282R
Q07889	3KSY	A	SOS1	1011	N	S	-0.16905	-0.16905	0	0.198809	0	False	0.457126	0.0704	0	SOS11011S
Q07889	3KSY	A	SOS1	977	Q	R	0.224328	0.224328	0	0.215305	0	False	0.434629	0	0	SOS1977R
Q07889	3KSY	A	SOS1	708	A	T	0.282359	0.282359	0	0.300718	0	False	0.509999	0	0	SOS1708T
Q07889	3KSY	A	SOS1	569	L	V	1.04982	1.04982	0	0.470201	0	False	0.495744	0	0	SOS1569V
Q07889	3KSY	A	SOS1	196	S	L	-0.499769	-0.499769	0	0.582995	0	False	0.36178	0	2.785	SOS1196L
P21359	3P7Z	A	NF1	1584	I	V	0	0	0	0.340966	0	False	0.00264523	0	0	NF11584V
P21359	3P7Z	A	NF1	1670	K	A	0.26118	0.26118	2	0.310311	0	False	0.407212	0	0	NF11670A
P21359	3P7Z	A	NF1	1674	R	A	0.604574	0.604574	0	0.395808	0	False	0.71715	0.446	0	NF11674A
P21359	3P7Z	A	NF1	1748	R	A	1.35648	1.35648	0	0.334673	0	False	0.318398	0	0	NF11748A
P21359	3P7Z	A	NF1	1764	A	S	1.4704	1.4704	0	0.353042	0	False	0.0140026	0	0	NF11764S
P21359	3P7Z	A	NF1	1750	K	A	0.710144	0.710144	0	0.347242	0	False	0.500275	0	0	NF11750A
P15056	3SKC	A	BRAF	671	R	K	-0.114908	-0.114908	0	0.316673	0	False	0.454891	0	0	BRAF671K
P15056	3SKC	A	BRAF	578	K	R	-0.234586	-0.234586	0	0.329416	0	False	0.102829	0.00404	0	BRAF578R
P15056	3SKC	A	BRAF	483	K	S	1.48108	1.48108	2	0.487443	0	False	0.191533	0.204	0	BRAF483S
P15056	4MNE	C	BRAF	671	R	K	1.63547	1.63547	0	0.367843	0	True	0.176374	0	0	BRAF671K
P15056	4MNE	C	BRAF	483	K	S	1.06387	1.06387	0	0.38341	0	False	0.266895	0	0	BRAF483S
P15056	4MNE	C	BRAF	578	K	R	0.351318	0.351318	0	0.274923	0	True	0.100835	0	0	BRAF578R
P04049	3OMV	A	RAF1	563	R	K	-0.143197	-0.143197	0	1	0	False	0.467338	0	0	RAF1563K
P04049	3OMV	A	RAF1	491	T	D	-0.41859	-0.41859	0	1	0	False	0.340892	0	0	RAF1491D
P00439	2PAH	A	PAH	403	A	V	1.2539	1.2539	0	0.803175	0	False	0.121999	0.63	0	PAH403V
P00439	2PAH	A	PAH	407	P	S	1.66746	1.66746	0	0.583	0	False	0.282939	0	0	PAH407S
P00439	2PAH	A	PAH	366	P	H	1.37403	1.37403	0	0.95485	0	False	0.398328	0	0	PAH366H
P00439	2PAH	A	PAH	173	P	T	1.7687	1.7687	0	0.515725	0	False	0.408904	0	0	PAH173T
P00439	2PAH	A	PAH	318	I	T	2.1308	2.1308	0	0.547475	0	True	0.0568333	0.234	1.391	PAH318T
P00439	2PAH	A	PAH	178	E	G	0.695822	0.695822	0	0.509025	0	False	0.70552	0.689	0	PAH178G
P00439	2PAH	A	PAH	325	Y	C	2.26005	2.26005	0	0.6711	0	True	0.0500646	1.81	1.28	PAH325C
P00439	2PAH	A	PAH	243	R	Q	0.899274	0.899274	0	0.45025	0	True	0.0292841	0	0	PAH243Q
P00439	2PAH	A	PAH	242	L	F	1.12366	1.12366	0	0.33165	0	True	0.00243877	0	0	PAH242F
P00439	2PAH	A	PAH	241	R	H	1.18335	1.18335	0	0.327025	0	False	0.25166	0	0	PAH241H
P00439	2PAH	A	PAH	241	R	C	-0.804339	-0.804339	0	0.327025	0	False	0.25166	0	0	PAH241C
P00439	2PAH	A	PAH	241	R	L	-1.58688	-1.58688	0	0.327025	0	False	0.25166	0	0	PAH241L
P00439	2PAH	A	PAH	247	G	V	0.498553	0.498553	0	0.66025	0	True	0	0	0	PAH247V
P00439	2PAH	A	PAH	246	A	D	0.177276	0.177276	0	0.599675	0	True	0.121999	0	0	PAH246D
P00439	2PAH	A	PAH	245	V	A	1.3583	1.3583	0	0.399725	0	True	0.0696731	0	0	PAH245A
P00439	2PAH	A	PAH	245	V	E	2.24767	2.24767	0	0.399725	0	True	0.0696731	0	0	PAH245E
P00439	2PAH	A	PAH	245	V	L	-0.685092	-0.685092	0	0.399725	0	True	0.0696731	0	0	PAH245L
P00439	2PAH	A	PAH	342	A	T	2.63788	2.63788	0	0.9846	0	False	0	1.03	0	PAH342T
P00439	2PAH	A	PAH	343	Y	C	-1.04114	-1.04114	0	0.9619	0	False	0.0190914	0.918	0	PAH343C
P00439	2PAH	A	PAH	341	K	R	-1.13918	-1.13918	0	0.97665	0	False	0.178441	1.03	0	PAH341R
P00439	2PAH	A	PAH	341	K	T	0.428456	0.428456	0	0.97665	0	False	0.178441	1.03	0	PAH341T
P00439	2PAH	A	PAH	345	A	S	1.58598	1.58598	0	0.783825	0	False	0.0119987	0.663	0	PAH345S
P00439	2PAH	A	PAH	257	G	C	2.03238	2.03238	0	0.375125	0	False	0	0.0719	0	PAH257C
P00439	2PAH	A	PAH	350	S	T	-0.612111	-0.612111	0	0.904625	0	False	0.174836	0.78	0	PAH350T
P00439	2PAH	A	PAH	414	Y	C	1.94521	1.94521	0	0.402825	0	False	0.0679451	0	0	PAH414C
P00439	2PAH	A	PAH	322	A	T	1.40789	1.40789	0	0.55415	0	True	0.133998	2.18	1.544	PAH322T
P00439	2PAH	A	PAH	322	A	G	1.03132	1.03132	0	0.55415	0	True	0.133998	2.18	1.544	PAH322G
P00439	2PAH	A	PAH	322	A	V	0.864001	0.864001	0	0.55415	0	True	0.133998	2.18	1.544	PAH322V
P00439	2PAH	A	PAH	167	N	I	1.42576	1.42576	0	0.640225	0	False	0.419251	0.0945	0	PAH167I
P00439	2PAH	A	PAH	167	N	S	-0.228262	-0.228262	0	0.640225	0	False	0.419251	0.0945	0	PAH167S
P00439	2PAH	A	PAH	334	C	S	0.616166	0.616166	0	0.966425	0	False	0.02277	0	0	PAH334S
P00439	2PAH	A	PAH	331	F	L	1.2555	1.2555	0	1	0	True	0.0784095	0.00917	0	PAH331L
P00439	2PAH	A	PAH	233	F	L	1.97946	1.97946	0	0.602125	0	False	0.14227	0.825	0	PAH233L
P00439	2PAH	A	PAH	338	D	Y	0.189349	0.189349	0	0.9746	0	False	0.644586	0.107	0	PAH338Y
P00439	2PAH	A	PAH	164	I	T	1.36934	1.36934	0	0.489725	0	False	0.136415	0.193	0	PAH164T
P00439	2PAH	A	PAH	297	R	H	1.26329	1.26329	0	0.33335	0	True	0.60222	0	0	PAH297H
P00439	2PAH	A	PAH	297	R	C	1.22132	1.22132	0	0.33335	0	True	0.60222	0	0	PAH297C
P00439	2PAH	A	PAH	169	R	H	1.03273	1.03273	0	0.450125	0	False	0.343392	0	0	PAH169H
P00439	2PAH	A	PAH	394	D	A	-1.32125	-1.32125	0	0.669075	0	False	0.244312	0	0	PAH394A
P00439	2PAH	A	PAH	394	D	H	-0.487544	-0.487544	0	0.669075	0	False	0.244312	0	0	PAH394H
P00439	2PAH	A	PAH	190	V	A	1.67021	1.67021	0	0.82605	0	False	0.0027208	4.78	0	PAH190A
P00439	2PAH	A	PAH	196	S	Y	0.129668	0.129668	0	0.985575	0	False	0.290146	4.71	0.875	PAH196Y
P00439	2PAH	A	PAH	224	I	M	-0.0892674	-0.0892674	0	0.5449	0	False	0.00234717	0	0.128	PAH224M
P00439	2PAH	A	PAH	226	Q	H	0.0469832	0.0469832	0	0.46395	0	False	0.0813571	0.0239	0.128	PAH226H
P00439	2PAH	A	PAH	221	E	G	1.68376	1.68376	0	0.743525	0	False	0.23526	0	0	PAH221G
P00439	2PAH	A	PAH	222	D	V	-0.106249	-0.106249	0	0.59195	0	True	0.402341	0	0	PAH222V
P00439	2PAH	A	PAH	175	P	A	2.02514	2.02514	0	0.679	0	False	0.231722	0.184	0	PAH175A
P00439	2PAH	A	PAH	174	I	V	1.33842	1.33842	0	0.597525	0	False	0.0085382	0	0	PAH174V
P00439	2PAH	A	PAH	177	V	M	0.108897	0.108897	0	0.55645	0	False	0.0849337	0.593	0	PAH177M
P00439	2PAH	A	PAH	177	V	L	0.325516	0.325516	0	0.55645	0	False	0.0849337	0.593	0	PAH177L
P00439	2PAH	A	PAH	176	R	P	0.0691106	0.0691106	0	0.613325	0	False	0.454435	0.332	0	PAH176P
P00439	2PAH	A	PAH	176	R	L	0.089529	0.089529	0	0.613325	0	False	0.454435	0.332	0	PAH176L
P00439	2PAH	A	PAH	170	H	Q	1.56599	1.56599	0	0.43705	0	False	0.132719	0	0	PAH170Q
P00439	2PAH	A	PAH	170	H	D	1.19437	1.19437	0	0.43705	0	False	0.132719	0	0	PAH170D
P00439	2PAH	A	PAH	158	R	Q	0.362308	0.362308	0	0.569575	0	False	0.166462	0	0	PAH158Q
P00439	2PAH	A	PAH	158	R	W	1.06974	1.06974	0	0.569575	0	False	0.166462	0	0	PAH158W
P00439	2PAH	A	PAH	212	L	P	1.22544	1.22544	0	0.7417	0	False	0.331388	0.0506	0.888	PAH212P
P00439	2PAH	A	PAH	217	C	G	0.808071	0.808071	0	0.849525	0	True	0.0256538	0	0	PAH217G
P00439	2PAH	A	PAH	273	S	F	-0.701678	-0.701678	0	0.703125	0	False	0.209361	0	0	PAH273F
P00439	2PAH	A	PAH	270	R	K	0.144859	0.144859	0	0.72475	0	True	0.0355839	0	0	PAH270K
P00439	2PAH	A	PAH	270	R	S	0.925567	0.925567	0	0.72475	0	True	0.0355839	0	0	PAH270S
P00439	2PAH	A	PAH	271	H	Y	-0.77937	-0.77937	0	0.800625	0	False	0.158189	0	0	PAH271Y
P00439	2PAH	A	PAH	276	M	I	1.32248	1.32248	0	0.709425	0	False	0.262063	0	0	PAH276I
P00439	2PAH	A	PAH	276	M	V	1.6443	1.6443	0	0.709425	0	False	0.262063	0	0	PAH276V
P00439	2PAH	A	PAH	277	Y	C	1.04451	1.04451	0	0.92015	0	False	0.38671	0	0	PAH277C
P00439	2PAH	A	PAH	277	Y	D	1.36507	1.36507	0	0.92015	0	False	0.38671	0	0	PAH277D
P00439	2PAH	A	PAH	274	K	E	0.341043	0.341043	0	0.6633	0	False	0.576334	0	0	PAH274E
P00439	2PAH	A	PAH	275	P	L	1.08372	1.08372	0	0.721075	0	False	0.179103	0	0	PAH275L
P00439	2PAH	A	PAH	278	T	A	-0.117864	-0.117864	0	0.76855	0	True	0.0423389	0	0	PAH278A
P00439	2PAH	A	PAH	278	T	N	0.439447	0.439447	0	0.76855	0	True	0.0423389	0	0	PAH278N
P00439	2PAH	A	PAH	207	N	S	-0.940979	-0.940979	0	0.8518	0	False	0.193178	0	3.672	PAH207S
P00439	2PAH	A	PAH	207	N	D	0.265927	0.265927	0	0.8518	0	False	0.193178	0	3.672	PAH207D
P00439	2PAH	A	PAH	205	E	A	-0.361984	-0.361984	0	0.8979	0	False	0.140257	0	80.025	PAH205A
P00439	2PAH	A	PAH	204	Y	C	1.41187	1.41187	0	0.929925	0	False	0.492954	0	97.682	PAH204C
P00439	2PAH	A	PAH	201	H	Y	-1.35842	-1.35842	0	0.968425	0	False	0.168859	0	98.659	PAH201Y
P00439	2PAH	A	PAH	201	H	R	0.862444	0.862444	0	0.968425	0	False	0.168859	0	98.659	PAH201R
P00439	2PAH	A	PAH	447	A	D	0.965435	0.965435	0	0.4603	0	False	0.232	0.92	0	PAH447D
P00439	2PAH	A	PAH	263	F	L	0.0428555	0.0428555	0	0.447275	0	True	0.0137375	0.0646	13.173	PAH263L
P00439	2PAH	A	PAH	265	C	G	1.98384	1.98384	0	0.586875	0	False	0.00158538	0	13.173	PAH265G
P00439	2PAH	A	PAH	269	I	L	-0.298264	-0.298264	0	0.60945	0	False	0.0085382	0	0	PAH269L
P00439	2PAH	A	PAH	380	T	M	-0.289338	-0.289338	0	0.979075	0	False	0.458828	0	0	PAH380M
P00439	2PAH	A	PAH	388	V	M	1.35582	1.35582	0	0.98545	0	False	0.103542	1.59	0	PAH388M
P00439	2PAH	A	PAH	388	V	L	0.0357228	0.0357228	0	0.98545	0	False	0.103542	1.59	0	PAH388L
P00439	2PAH	A	PAH	372	T	S	-1.22217	-1.22217	0	0.901775	0	False	0	0.23	0	PAH372S
P00439	2PAH	A	PAH	143	D	G	0.0599304	0.0599304	0	0.94905	0	True	0.591001	0.0695	0	PAH143G
P00439	2PAH	A	PAH	377	Y	C	2.02752	2.02752	0	0.998325	0	False	0.187437	0	0	PAH377C
P00439	2PAH	A	PAH	145	D	V	0.121507	0.121507	0	0.829775	0	False	0.444574	0	0	PAH145V
P00439	2PAH	A	PAH	146	H	Y	-1.8241	-1.8241	0	0.689025	0	False	0.146495	0	0	PAH146Y
P00439	2PAH	A	PAH	252	R	Q	1.04717	1.04717	0	0.301425	0	True	0.143659	0	0	PAH252Q
P00439	2PAH	A	PAH	252	R	G	2.0375	2.0375	0	0.301425	0	True	0.143659	0	0	PAH252G
P00439	2PAH	A	PAH	415	D	N	0.255606	0.255606	0	0.519125	0	False	0.278441	0	0	PAH415N
P00439	2PAH	A	PAH	418	T	P	2.07349	2.07349	0	0.232125	0	False	0.234821	0.306	0	PAH418P
P00439	2PAH	A	PAH	413	R	S	0.60371	0.60371	0	0.38345	0	False	0.375697	0	0	PAH413S
P00439	2PAH	A	PAH	390	E	G	0.190163	0.190163	0	0.923825	0	False	0.555346	0.763	0	PAH390G
P00439	2PAH	A	PAH	151	D	H	1.72031	1.72031	0	0.803075	0	False	0.204888	0.0306	0	PAH151H
P00439	2PAH	A	PAH	309	A	V	0.505219	0.505219	0	0.383075	0	True	0.00799914	0.143	0	PAH309V
P00439	2PAH	A	PAH	306	I	V	0.805816	0.805816	0	0.2926	0	True	0.0283706	0.145	0	PAH306V
P00439	2PAH	A	PAH	304	Q	R	1.3635	1.3635	0	0.095175	0	False	0.0783992	0.0432	0	PAH304R
P00439	2PAH	A	PAH	300	A	S	0.0933342	0.0933342	0	0.310775	0	True	0	0	0	PAH300S
